# Supplementary material
Source: PubMed Central journal article supplement (PMC8154637)
Supplement: NIHMS1655161-supplement-1.pdf [file NIHMS1655161-supplement-1.pdf]

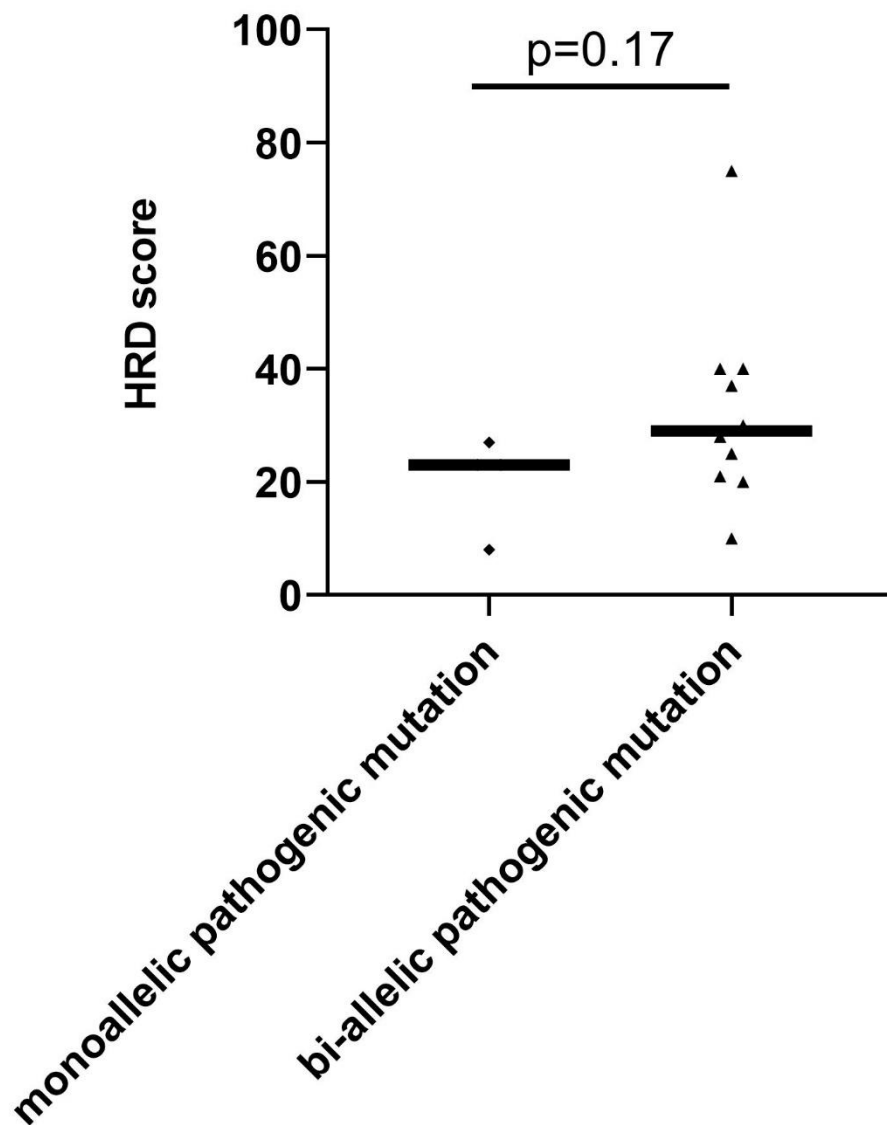

Supplementary Figure S1: HRD scores in JHU germline *BRCA2*-mutated cases by monoallelic vs bi-allelic mutation status.

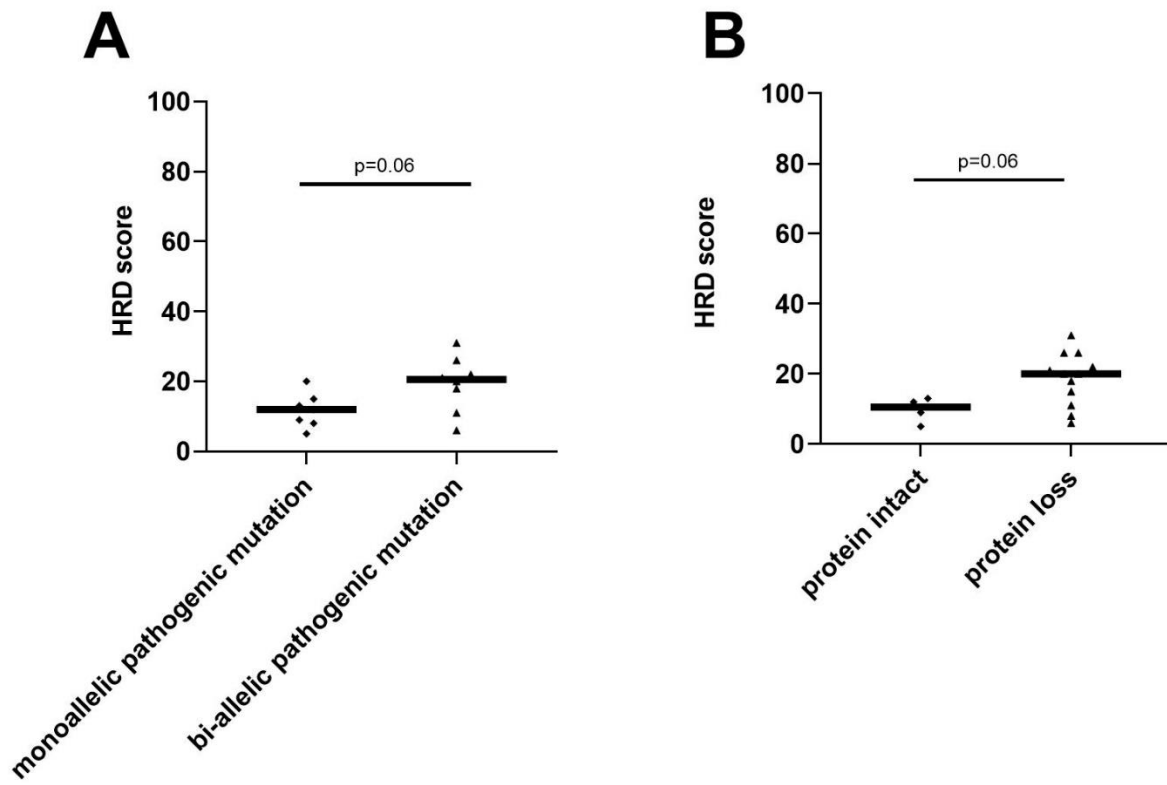

Supplementary Figure S2: (A) HRD scores in JHU germline *ATM*-mutated cases by monoallelic vs bi-allelic mutation status. (B) HRD scores in JHU germline *ATM*-mutated cases by protein status on immunohistochemistry.

### Whole TCGA cohort

### TCGA without HR gene and TP53 mutant cases

**A**

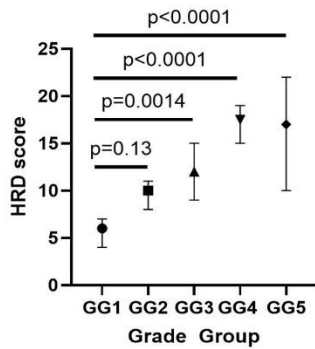

**B**

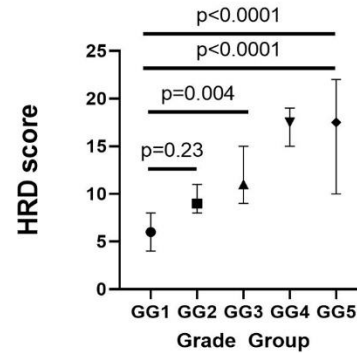

**C**

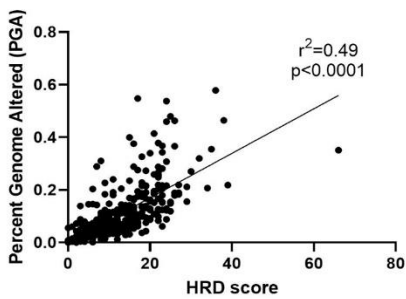

**D**

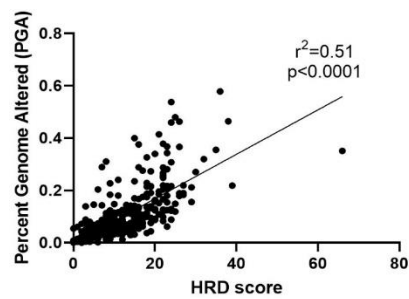

**E**

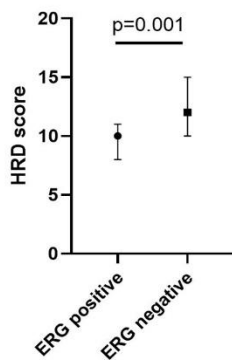

**F**

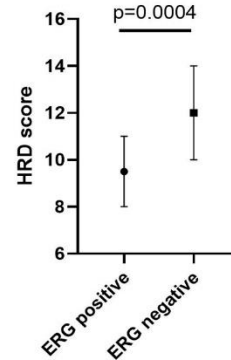

**G**

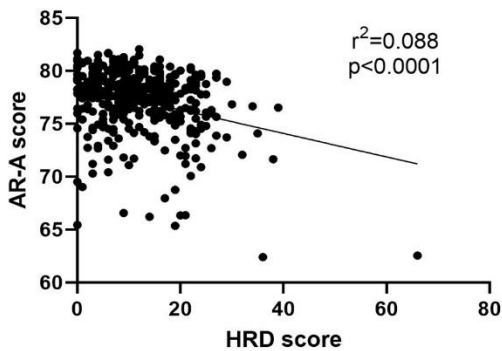

**H**

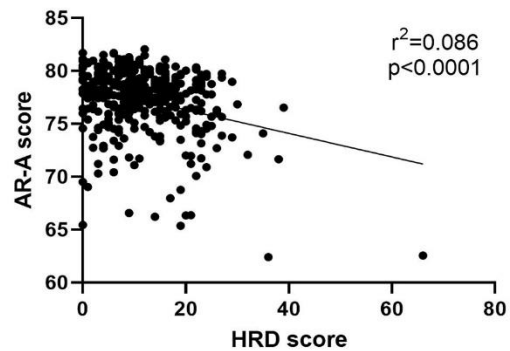

### Supplementary Figure S3: Association of HRD score with pathologic and molecular features.

(A,B) Association of HRD score with Gleason Grade Group in TCGA cohort; (C,D) Association of HRD score with percent genome altered in TCGA cohort; (E,F): Association of HRD score with *ERG* fusion status in TCGA cohort; (G,H) Association of HRD score with Androgen Receptor Activity (AR-A) score in TCGA cohort.

**A**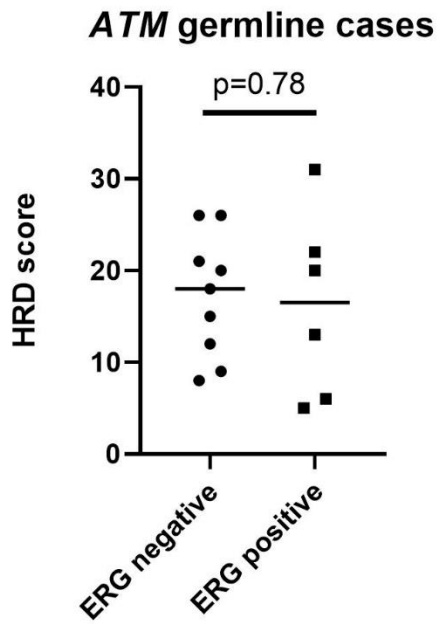**B**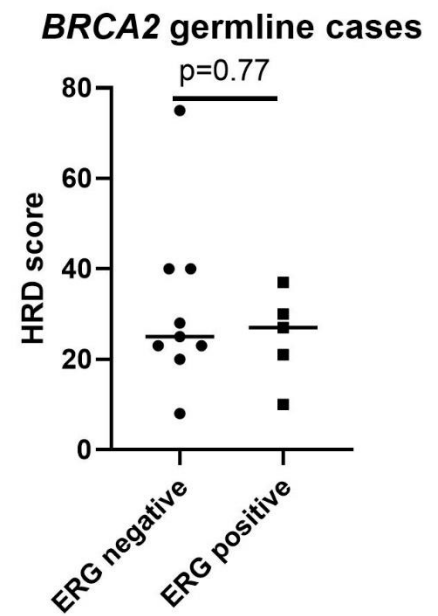

**Supplementary Figure S4: Association of ERG status with HRD score.** (A) Association of *ERG* status by immunohistochemistry with HRD score among JHU ATM germline mutated primary prostate tumors; (B) Association of *ERG* status by immunohistochemistry with HRD score among *BRCA2* germline mutated primary prostate cancers.

**Supp Table S1: Clinical-pathologic and molecular features of primary prostate tumors with germline *BRCA2* mutations**

| ID     | germline <i>BRCA2</i> mutation | Germline?         | <i>BRCA2</i> mutation from tumor sequencing      | LOH       | Presumed biallelic? | age | Race | Gleason (Primary) | Gleason (Secondary) | Gleason (Sum) | Pathologic Stage | Myriad HRD |
|--------|--------------------------------|-------------------|--------------------------------------------------|-----------|---------------------|-----|------|-------------------|---------------------|---------------|------------------|------------|
| BRCA19 | p.L2357Vfs*2                   | Germline inferred | p.L2357Vfs*2+Uncharacterized Large Rearrangement | Uncertain | Yes                 | 56  | W    | 5                 | 4                   | 9             | T3bN0            | failed     |
| BRCA2  | p.Y2215fs*13                   | Germline inferred | p.Y2215Sfs*13                                    | No        | No                  | 63  | W    | 5                 | 4                   | 9             | T3bN0            | 27         |
| BRCA9  | p.S2670L                       | germline          | p.S2670L                                         | No        | No                  | 45  | B    | 4                 | 4                   | 8             | T2xN0            | 23         |
| BRCA14 | p.I2627F                       | germline          | p.I2627F                                         | No        | No                  | 62  | W    | 4                 | 3                   | 7             | T2N0             | 23         |
| BRCA17 | S1982R fs*22                   | germline          | p.S1982Rfs*22                                    | No        | No                  | 48  | W    | 4                 | 5                   | 9             | T3bN1            | 8          |
| BRCA3  | p.Y1710Vfs                     | germline          | failed                                           | failed    | Uncertain           | 50  | W    | 5                 | 4                   | 9             | T3aN0            | failed     |
| BRCA12 | p.S1982R fs*22                 | germline          | not sent                                         | not sent  | Uncertain           | 61  | W    | 4                 | 5                   | 9             | T3aN0            | not sent   |
| BRCA1  | p.V2263Efs*10                  | germline          | p.V2263Efs*10                                    | Yes       | Yes                 | 58  | B    | 4                 | 5                   | 9             | T3bN1            | 20         |
| BRCA4  | p.T1325fs*6                    | germline          | p.A1327Cfs*4                                     | Yes       | Yes                 | 66  | W    | 3                 | 3                   | 6             | T2N0             | 25         |
| BRCA7  | p.T1388Nfs*22                  | germline          | p.N1049Pfs*4+p.L1390Wfs*20                       | Uncertain | Yes                 | 71  | W    | ductal            |                     |               | T2N0             | 75         |
| BRCA8  | p.E3111*                       | germline          | p.Q2501*+p.E3111*                                | Uncertain | Yes                 | 50  | W    | 5                 | 4                   | 9             | T2xnN0           | 28         |
| BRCA10 | p.D3095E                       | germline          | p.D3095E                                         | Yes       | Yes                 | 52  | W    | 4                 | 5                   | 9             | T3bN1            | 21         |
| BRCA11 | p.A938P fs*21                  | germline          | p.A938Pfs*21                                     | Yes       | Yes                 | 58  | W    | 4                 | 5                   | 9             | T3bN0            | 40         |
| BRCA13 | p.I605Yfs*9                    | germline          | p.I605Yfs*9                                      | Yes       | Yes                 | 40  | A    | 4                 | 5                   | 9             | T3bN0            | 30         |
| BRCA15 | p.N319Kfs*8                    | germline          | p.N319Kfs*8                                      | Yes       | Yes                 | 68  | A    | 5                 | 4                   | 9             | T2N0             | 40         |
| BRCA16 | p.W1692M fs*3                  | germline          | p.W1692Mfs*3                                     | Yes       | Yes                 | 59  | W    | 3                 | 4                   | 7             | T3aN0            | 10         |
| BRCA6  | p.V1681Efs*7                   | germline inferred | p.V1681Efs*7                                     | Yes       | Yes                 | 51  | W    | 5                 | 4                   | 9             | T3bN1            | 37         |

**Supp Table S2: Clinical-Pathologic and molecular features of primary prostate tumors with germline *ATM* mutation**

| ID    | <i>ATM</i> Mutation from germline sequencing | <i>ATM</i> mutation from tumor sequencing          | Myriad-LOH | Presumed bi-allelic? | <i>ATM</i> IHC     | Age | Race | Gleason (Primary) | Gleason (Secondary) | Gleason (Sum) | Pathologic Stage | Myriad HRD |
|-------|----------------------------------------------|----------------------------------------------------|------------|----------------------|--------------------|-----|------|-------------------|---------------------|---------------|------------------|------------|
| ATM4  | p.R2598*                                     | p.R2598*                                           | No         | No                   | Intact             | 69  | W    | 4                 | 5                   | 9             | T3AN0MX          | 13         |
| ATM9  | p.R2546_S2548del                             | p.R2547_S2549del                                   | No         | No                   | Intact             | 49  | W    | 4                 | 5                   | 9             | T3AN0MX          | 5          |
| ATM17 | p.S274fs*                                    | p.L275*                                            | No         | No                   | Intact             | 47  | W    | 4                 | 5                   | 9             | T2N0MX           | 12         |
| ATM22 | p.S160Afs*23                                 | p.S160Afs*23                                       | No         | No                   | Intact             | 65  | W    | 4                 | 5                   | 9             | T3BN1MX          | 9          |
| ATM11 | p.K750K                                      | p.K750K+p.A1272N (VUS)                             | No         | No                   | Heterogeneous Loss | 63  | W    | 4                 | 4                   | 8             | T2N0MX           | 8          |
| ATM6  | p.L2005fs*13                                 | p.Q2007Rfs*11 + p.W3055C (VUS)                     | No         | No                   | Loss               | 74  | W    | 4                 | 5                   | 9             | T3AN1MX          | 20         |
| ATM13 | p.S1905fs*25                                 | p.S1905fs*25                                       | No         | No                   | Loss               | 44  | W    | 4                 | 3                   | 7             | T3BN0MX          | 15         |
| ATM5  | c.8988-1G>A                                  | c.8988-1G>A                                        | Yes        | Yes                  | Heterogeneous Loss | 53  | W    | 4                 | 5                   | 9             | T3AN0MX          | 20         |
| ATM3  | p.D2795fs*8                                  | p.F2799Kfs*4                                       | Yes        | Yes                  | Loss               | 64  | W    | 5                 | 4                   | 9             | T2N0MX           | 6          |
| ATM10 | p.K750K                                      | p.K750K                                            | Yes        | Yes                  | Loss               | 64  | W    | 4                 | 4                   | 8             | T2N0MX           | 31         |
| ATM12 | Duplication exon 48                          | Uncharacterized large rearrangement + p.I2356Vfs*2 | Uncertain  | Yes                  | Loss               | 55  | W    | 4                 | 5                   | 9             | T3BN0MX          | 18         |
| ATM15 | p.K2756*                                     | p.K2756* + del exons 33-62                         | No         | Yes                  | Loss               | 61  | W    | 5                 | 4                   | 9             | T3BN1MX          | 22         |
| ATM20 | p.L1107*                                     | p.L1107*                                           | Yes        | Yes                  | Loss               | 60  | W    | 4                 | 3                   | 7             | T2N0MX           | 26         |
| ATM16 | p.N845fs*2                                   | p.N845fs*2                                         | Yes        | Yes                  | Loss               | 69  | W    | 5                 | 4                   | 9             | T3AN0MX          | 21         |
| ATM28 | p.R447X* + del exons 1-32                    | p.R447* + del exons 1-32                           | No         | Yes                  | Loss               | 65  | W    | 4                 | 5                   | 9             | T3BN1MX          | 11         |
| ATM21 | c.7629 +2 T>C                                | c.7629+2T>C                                        | ND         | Uncertain            | Intact             | 60  | W    | 3                 | 4                   | 7             | T3AN0MX          | failed     |
| ATM1  | p.T452fs*21                                  | p.T452Nfs*21                                       | Uncertain  | Uncertain            | Heterogeneous Loss | 52  | W    | 3                 | 3                   | 6             | T2N0MX           | failed     |
| ATM18 | p.K2756*                                     | p.K2756*                                           | Uncertain  | Uncertain            | Loss               | 54  | W    | 4                 | 3                   | 7             | T3AN0MX          | failed     |
| ATM8  | p.G1458fs*15                                 | p.G1458Qfs*15                                      | Uncertain  | Uncertain            | Loss               | 75  | W    | 4                 | 5                   | 9             | T3AN0MX          | 26         |
| ATM14 | c.8786+1G>A                                  | c.8786+1G>A                                        | Uncertain  | Uncertain            | Loss               | 50  | W    | 4                 | 5                   | 9             | T3AN0MX          | failed     |
| ATM19 | p.K2589*                                     | p.K2589*                                           | Uncertain  | Uncertain            | Loss               | 55  | W    | 5                 | 4                   | 9             | T3BN0MX          | failed     |

**Supp Table S3: Clinical-pathologic and molecular features of primary prostate tumors with inferred somatic *ATM* mutation and protein loss**

| ID    | <i>ATM</i> mutation from tumor sequencing                        | Inferred germline or somatic | LOH       | Presumed bi-allelic? | <i>ATM</i> IHC     | Age | Race | Gleason (Primary) | Gleason (Secondary) | Gleason (Sum) | Pathologic Stage | Myriad HRD |
|-------|------------------------------------------------------------------|------------------------------|-----------|----------------------|--------------------|-----|------|-------------------|---------------------|---------------|------------------|------------|
| ATM33 | p.Q513*                                                          | indeterminate                | Uncertain | Uncertain            | Heterogeneous Loss | 58  | W    | 3                 | 4                   | 7             | T2N0MX           | 11         |
| ATM40 | Complex Large Rearrangement+ p.V2766K (VUS)                      | somatic                      | No        | No                   | Heterogeneous Loss | 55  | W    | 4                 | 3                   | 7             | T3AN0MX          | 20         |
| ATM37 | p.Q2220Rfs*15                                                    | somatic                      | No        | No                   | Heterogeneous Loss | 59  | W    | 4                 | 4                   | 8             | T2N0MX           | 21         |
| ATM38 | c.185+1G>A                                                       | somatic                      | Yes       | Yes                  | Heterogeneous Loss | 56  | W    | 4                 | 4                   | 8             | T3BN0MX          | 11         |
| ATM39 | p.Q893*                                                          | somatic                      | Yes       | Yes                  | Heterogeneous Loss | 67  | W    | 4                 | 4                   | 8             | T3BN0MX          | 20         |
| ATM32 | Uncharacterized Large Rearrangement                              | somatic                      | Yes       | Yes                  | Heterogeneous Loss | 67  | W    | 4                 | 5                   | 9             | T3AN0MX          | 19         |
| ATM23 | p.Q1361*                                                         | somatic                      | Uncertain | Uncertain            | Loss               | 57  | W    | 4                 | 5                   | 9             | T3BN0MX          | 25         |
| ATM24 | p.S743*                                                          | somatic                      | Uncertain | Uncertain            | Loss               | 59  | W    | 4                 | 5                   | 9             | T3BN0MX          | failed     |
| ATM30 | ~28bp indel that takes out the exon 11/intron 11 splice boundary | somatic                      | yes       | Yes                  | loss               |     |      | 5                 | 4                   | 9             | T3AN0MX          | 20         |
| ATM31 | p.H2195Qfs*5                                                     | somatic                      | yes       | Yes                  | loss               |     |      | 5                 | 4                   | 9             | T3AN0MX          | 15         |
| ATM25 | p.L1722Rfs*25+ c.2124+1G>A                                       | somatic                      | No        | Yes                  | Loss               | 71  | W    | 3                 | 4                   | 7             | T3BN0MX          | 17         |

**Supp Table S4: Clinical-pathologic and molecular features of primary prostate tumors with germline *CHEK2* mutations**

| ID     | <i>CHEK2</i> mutation from germline sequencing | <i>CHEK2</i> mutation from tumor sequencing | Category              | LOH | age | Race | Gleason (Primary) | Gleason (Secondary) | Gleason (Sum) | Pathologic Stage | Myriad HRD |
|--------|------------------------------------------------|---------------------------------------------|-----------------------|-----|-----|------|-------------------|---------------------|---------------|------------------|------------|
| CHEK4  | p.T367Mfs*15                                   | p.Thr367Metfs*15                            | Deleterious           | 0   | 60  | W    | 5                 | 4                   | 9             | T3AN0MX          | 9          |
| CHEK8  | p.T367Mfs*15                                   | p.Thr367Metfs*15                            | Deleterious           | 0   | 62  | W    | 4                 | 5                   | 9             | T3BN0MX          | FAILED     |
| CHEK11 | p.T367Mfs*15                                   | p.Thr367Metfs*15                            | Deleterious           | 0   | 52  | W    | 3                 | 3                   | 6             | T2N0MX           | 9          |
| CHEK16 | p.T367Mfs*15                                   | p.Thr367Metfs*15                            | Deleterious           | 0   | 66  | W    | 4                 | 4                   | 8             | T3BN0MX          | 11         |
| CHEK18 | p.R519X*                                       | p.Arg519*                                   | Deleterious           | 0   | 54  | O    | 5                 | 4                   | 9             | T3AN0MX          | 20         |
| CHEK19 | p.T367Mfs*15                                   | p.Thr367Metfs*15                            | Deleterious           | 0   | 60  | W    | 3                 | 3                   | 6             | T2N0MX           | 4          |
| CHEK7  | c.1095 +1 G>T                                  | c.1095+1G>T                                 | Deleterious           | 0   | 49  | W    | 4                 | 5                   | 9             | T3BN0MX          | 7          |
| CHEK10 | p.T476M                                        | No_deleterious variants detected            | Suspected deleterious | 0   | 59  | W    | 4                 | 5                   | 9             | T3AN0MX          | 23         |
| CHEK2  | p.S428F                                        | p.Ser428Phe                                 | Suspected deleterious | 0   | 68  | W    | 3                 | 3                   | 6             | T2N0MX           | 4          |
| CHEK3  | p.R181C                                        | p.Arg181Cys                                 | Suspected deleterious | 0   | 65  | W    | 3                 | 3                   | 6             | T2N0MX           | FAILED     |
| CHEK6  | p.S428F                                        | p.Ser428Phe                                 | Suspected deleterious | 0   | 63  | W    | 4                 | 4                   | 8             | T3AN0MX          | 13         |
| CHEK12 | p.S428F                                        | p.Ser428Phe                                 | Suspected deleterious | 0   | 46  | W    | 3                 | 3                   | 6             | T2N0MX           | 1          |
| CHEK13 | p.S428F                                        | p.Ser428Phe                                 | Suspected deleterious | 0   | 64  | W    | 3                 | 3                   | 6             | T2N0MX           | 24         |
| CHEK14 | p.S428F                                        | p.Ser428Phe                                 | Suspected deleterious | 0   | 66  | W    | 3                 | 5                   | 8             | T3bN1MX          | 4          |
| CHEK17 | p.I157T                                        | p.Ile157Thr                                 | Suspected deleterious | 0   | 58  | W    | 4                 | 4                   | 8             | T3AN0MX          | 5          |



**Supp Table S5: Clinical-pathologic characteristics of the 8 patients with *BRCA2*-altered prostate cancer with evaluable HRD scores and who underwent treatment with olaparib**

| <b>Characteristic</b>                                              | <b>Summary</b> |
|--------------------------------------------------------------------|----------------|
| Age, yr<br>Median                                                  | 58 yr          |
| Race<br>White, %<br>Non-white, %                                   | 63%<br>37%     |
| Gleason sum<br>7-8 (grade group 3-4), %<br>9-10 (grade group 5), % | 63%<br>37%     |
| PSA at start of olaparib, ng/mL<br>Median                          | 19.4 ng/mL     |
| Prior abiraterone<br>Percentage                                    | 88%            |
| Prior enzalutamide<br>Percentage                                   | 75%            |
| Prior taxane chemotherapy<br>Percentage                            | 63%            |
| Number of prior systemic therapies<br>Median                       | 4              |
| Presence of bone metastases<br>Percentage                          | 88%            |
| Presence of visceral metastases<br>Percentage                      | 37%            |
| Presence of pain<br>Percentage                                     | 25%            |
| ECOG performance status<br>0<br>1-2                                | 50%<br>50%     |
